# Supplementary material for: Silver(i) ions modulate the stability of DNA duplexes containing cytosine, methylcytosine and hydroxymethylcytosine at different salt concentrations
Source: Royal Society of Chemistry journal article supplement (doi:10.1039/c4ra14490b), 2014-12-04
Supplement: c4ra14490b1.pdf [file c4ra14490b1.pdf]

## Supplementary Information

### Silver(I) Ions Modulate the Stability of DNA Duplexes Containing Cytosine, Methylcytosine and Hydroxymethylcytosine at Different Salt Concentrations

Yong Wang, Brandon Ritzo, and Li-Qun Gu

**Table S1: Synthesized DNA duplexes containing a C-C, 5mC-C or 5hmC-C base pair mismatch and their melting temperatures ( $T_m$ , °C) with different  $\text{KNO}_3$  concentrations.**

| 5'- AATAAAATAXTATAAA-3' (X=C, 5mC or 5hmC) |                                     |                                     |                                |                                                                        |
|--------------------------------------------|-------------------------------------|-------------------------------------|--------------------------------|------------------------------------------------------------------------|
| 3'- TTATTTTATCATATTT-5'                    |                                     |                                     |                                |                                                                        |
|                                            | $T_m(^{\circ}\text{C})$ ,<br>-Ag(I) | $T_m(^{\circ}\text{C})$ ,<br>+Ag(I) | $\Delta T_m(^{\circ}\text{C})$ | $T_m(^{\circ}\text{C})$ , simulation in NaCl) <sup>a</sup> ,<br>-Ag(I) |
| C-C (100mM)                                | 20.0±0.0                            | 35.0±0.0                            | 15.0±0.0 <sup>b</sup>          | 18.6                                                                   |
| 5mC-C (100mM )                             | 21.7±0.4                            | 34.3±0.3                            | 12.6±0.5                       |                                                                        |
| 5hmC-C (100mM )                            | 18.0±0.5                            | 33.2±0.5                            | 15.2±0.7                       |                                                                        |
| C-C (1M)                                   | 28.5±0.6                            | 43.5±0.6                            | 15.0±0.8                       | 31.1                                                                   |
| 5mC-C (1M )                                | 29.1±0.8                            | 42.4±1.0                            | 13.3±1.3                       |                                                                        |
| 5hmC-C (1M)                                | 27.6±0.3                            | 39.9±1.8                            | 12.3±1.8                       |                                                                        |
| C-C (10mM)                                 | N.O. <sup>c</sup>                   |                                     |                                | 0.6                                                                    |

<sup>a</sup>: The  $T_m$  values were calculated by the program (<http://biophysics.idtdna.com>) with different NaCl concentrations;

<sup>b</sup>: Standard deviations for these changes were calculated by error propagation equation;

<sup>c</sup>: "N.O.", no observation. This is because the 16-bp DNA duplex contains no C-G pairs and has a mismatch, and the calculated  $T_m$  was 0.6°C, which suggests rare duplex formation at 10mM salt.

Experimental measurements were repeated at least three times for each sample. Data were presented as average ± standard deviation.

## Materials and Methods

DNA oligonucleotides (Table S1) were synthesized and electrophoresis-purified by Integrated DNA Technologies Inc, CA. Before testing, the mixtures of ssDNAs were heated to 90 °C for 5 minutes, then gradually cooled down to room temperature and stored at 4 °C. Samples contained 1  $\mu$ M duplex, 100 mM KNO<sub>3</sub> and 10 mM Mops, pH=7.1<sup>1</sup>. KNO<sub>3</sub> was used because it can be applied to other experimental methods, like nanopore single-channel recording<sup>2</sup>. Using the nanopore sensor<sup>3</sup>, we are currently working on the detection of silver(I) using DNA duplex containing C-C mismatch. KCl was used as the buffer in the majority of previous nanopore experiments, but is cannot be used for silver(I) detection. In this situation, we are using KNO<sub>3</sub> as the buffer.

### **Melting Temperature Determination for DNA Duplexes.**

The melting temperatures of duplexes containing cytosine-cytosine, methylcytosine-cytosine, or hydroxymethylcytosine-cytosine mismatches were determined by monitoring the increase in absorbance at 260nm as a function of temperature. The temperature was increased from 4°C to 50°C (for samples without silver(I)), or from 10°C to 60°C (for samples with silver(I)), at a rate of 0.5°C/min<sup>1</sup>. 2  $\mu$ M silver(I) were used in the experiment, because previous studies found that the melting temperature reached a plateau when the silver(I) concentration was 1.5 fold higher than the DNA<sup>1</sup>. The *T<sub>m</sub>* was measured by the Cary 100 Bio UV-Visible spectrophotometer. The melting temperature was calculated from the collected data using the Cary WinUV Thermal software.

- 1 A. Ono, S. Cao, H. Togashi, M. Tashiro, T. Fujimoto, T. Machinami, S. Oda, Y. Miyake, I. Okamoto and Y. Tanaka, *Chemical communications*, 2008, 4825.
- 2 Y. Miyake, H. Togashi, M. Tashiro, H. Yamaguchi, S. Oda, M. Kudo, Y. Tanaka, Y. Kondo, R. Sawa, T. Fujimoto, T. Machinami and A. Ono, *Journal of the American Chemical Society*, 2006, **128**, 2172.
- 3 (a) S. Howorka and Z. Siwy, *Chemical Society reviews*, 2009, **38**, 2360; (b) I. Kang, Y. Wang, C. Reagan, Y. Fu, M. X. Wang and L.-Q. Gu, *Scientific reports*, 2013, **3**; (c) Y. Wang, D. Zheng, Q. Tan, M. X. Wang and L. Q. Gu, *Nature nanotechnology*, 2011, **6**, 668.
